# Supplementary material for: Anomalous polarization dependence of Raman scattering and crystallographic orientation of black phosphorus
Source: Royal Society of Chemistry journal article supplement (doi:10.1039/c5nr04349b), 2015-01-01
Supplement: c5nr04349b2.pdf [file c5nr04349b2.pdf]

## Electronic Supplementary Information (ESI)

# Anomalous polarization dependence of Raman scattering and crystallographic orientation of black phosphorus

*Jungcheol Kim,<sup>a, ‡</sup> Jae-Ung Lee,<sup>a, ‡</sup> Jinhwan Lee,<sup>b, ‡</sup> Hyo Ju Park,<sup>c</sup> Zonghoon Lee,<sup>c</sup>*

*Changgu Lee<sup>b, d, \*</sup> and Hyeonsik Cheong<sup>a, \*</sup>*

<sup>a</sup> Department of Physics, Sogang University, Seoul 121-742, Korea

<sup>b</sup> Department of Mechanical Engineering and Center for Human Interface Nano Technology (HINT), Sungkyunkwan University, Suwon, 440-746, Korea

<sup>c</sup> School of Materials Science and Engineering, Ulsan National Institute of Science and Technology (UNIST), Ulsan 689-798, Korea

<sup>d</sup> SKKU Advanced Institute of Nanotechnology (SAINT), Sungkyunkwan University, Suwon, 440-746, Korea

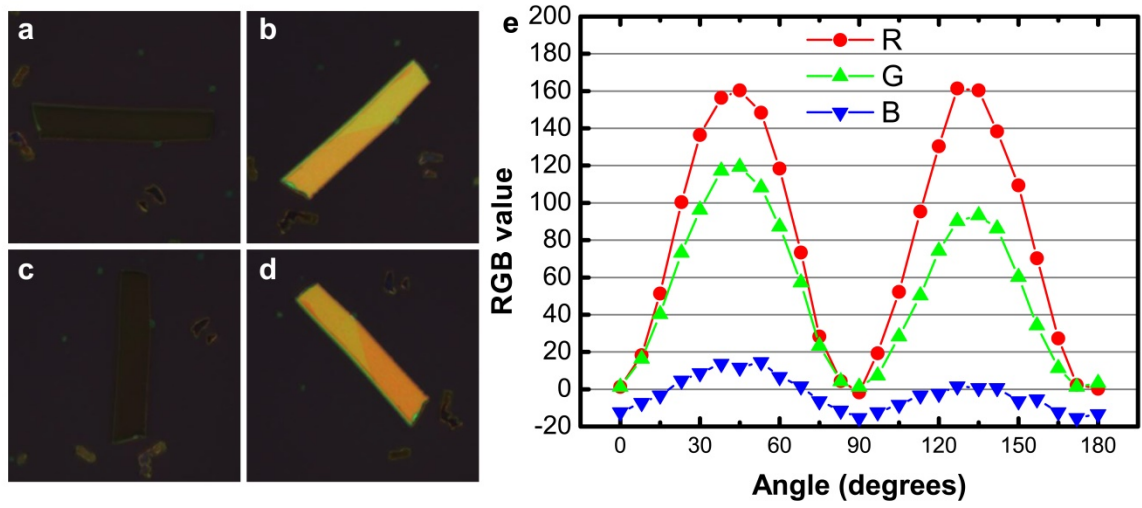

Fig. S1 Orientation dependence of color of a BP crystal on a SiO<sub>2</sub>/Si substrate in reflection mode. (a-d) Optical images taken with reflected light in cross polarization. (e) The RGB values of the sample image with respect to that of the substrate as a function of the angle between the incident polarization and the long straight edge. There is a small difference between 45° and 135°.

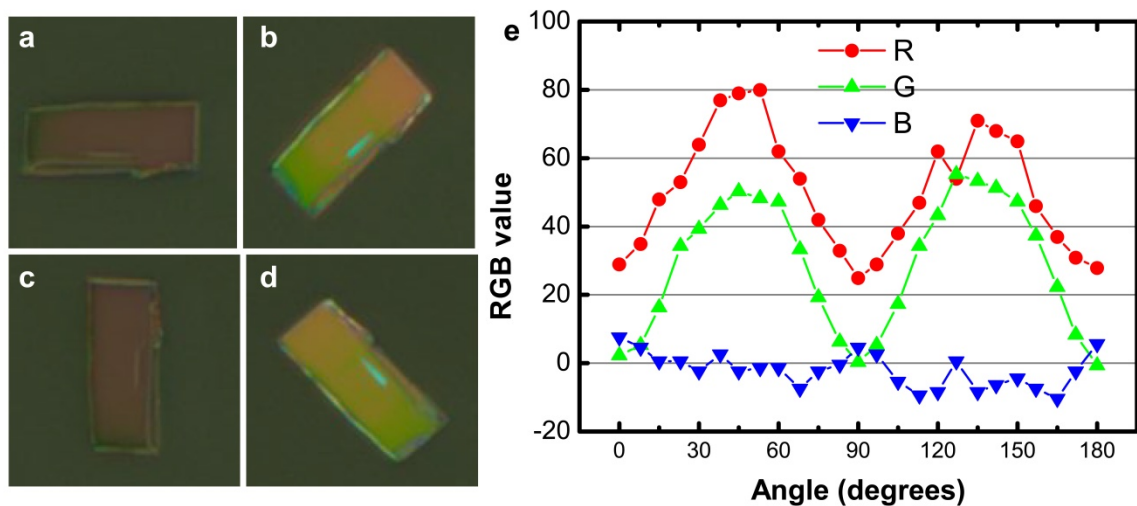

Fig. S2 Orientation dependence of color of a BP crystal on slide glass in reflection mode. (a-d) Optical images taken with reflected light in cross polarization. (e) The RGB values of the sample image with respect to that of the substrate as a function of the angle between the incident polarization and the long straight edge. There is a small difference between  $45^\circ$  and  $135^\circ$ .

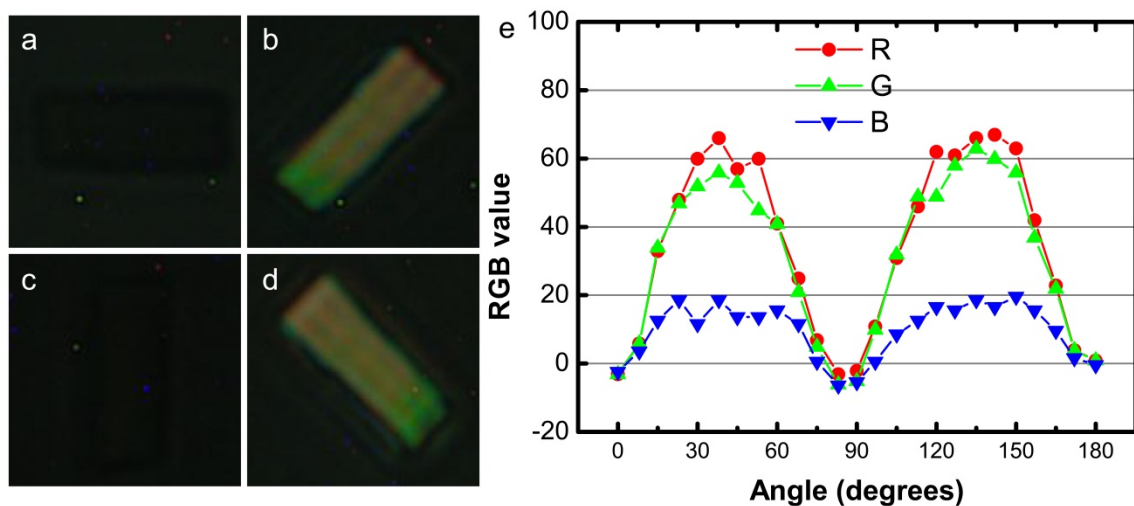

Fig. S3 Orientation dependence of color of a BP crystal on slide glass in transmission mode. (a-d) Optical images taken with transmitted light in cross polarization. (e) The RGB values of the sample image with respect to that of the substrate as a function of the angle between the incident polarization and the long straight edge. There is no appreciable difference between  $45^\circ$  and  $135^\circ$ .

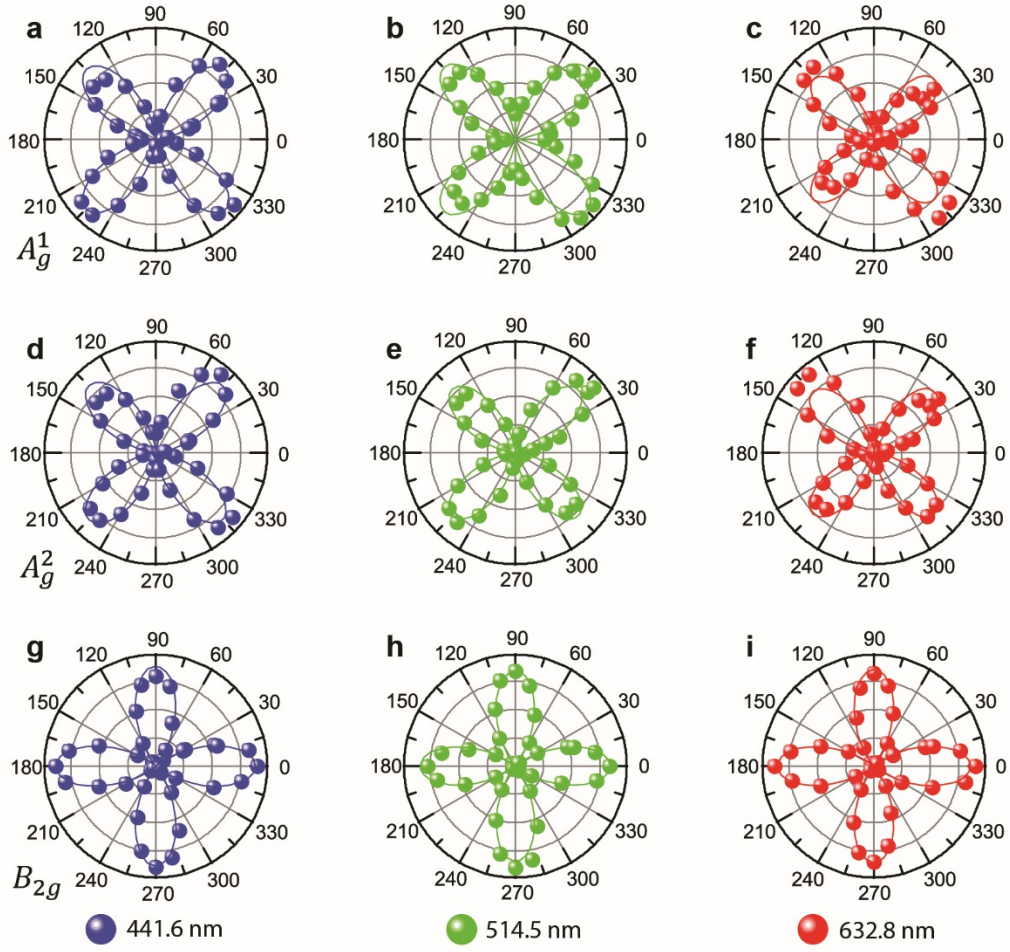

Fig. S4 Polarization dependence of Raman modes in cross polarization. Each row shows polarization dependence of  $A_g^1$ ,  $A_g^2$  and  $B_{2g}$  modes, respectively, taken with excitation wavelengths of 441.6, 514.5, 632.8 nm as indicated.

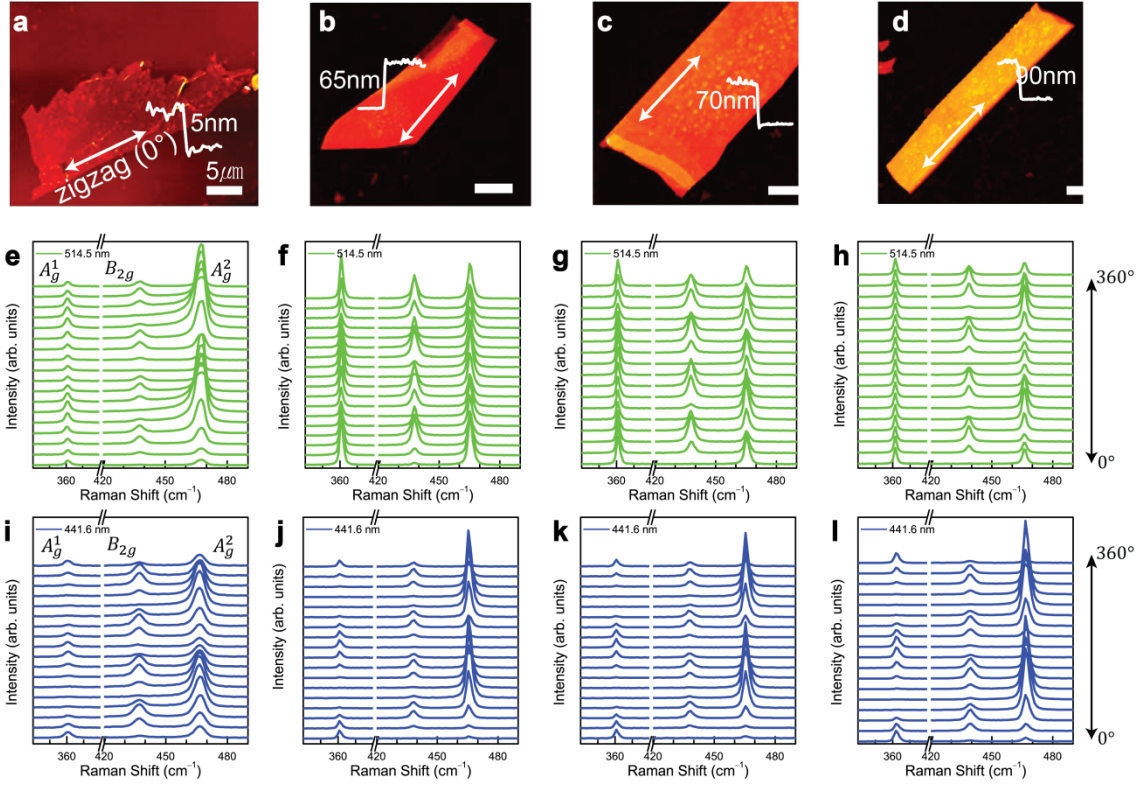

Fig. S5 Raman spectra corresponding to data in Fig. 5(e-p). The spectra are shown in 20-degree increments. (e-h) and (i-l) are taken with the excitation wavelengths of 514.5 and 441.6 nm, respectively.

Table S1 Refractive indices used in the calculation.

| Wavelength<br>h (nm) | BP (zigzag) <sup>1</sup> | BP (armchair) <sup>1</sup> | SiO <sub>2</sub> <sup>2</sup> | Si <sup>3</sup> |
|----------------------|--------------------------|----------------------------|-------------------------------|-----------------|
| 441.6                | 4.10-0.21i               | 3.92-0.94i                 | 1.47                          | 4.79-0.10i      |
| 449.1                | 4.06-0.15i               | 3.88-0.65i                 | 1.47                          | 4.70-0.090i     |
| 450.6                | 4.05-0.14i               | 3.87-0.64i                 | 1.47                          | 4.68-0.087i     |
| 488.0                | 3.76-0.064i              | 3.66-0.45i                 | 1.46                          | 4.36-0.035i     |
| 497.1                | 3.72-0.060i              | 3.64-0.43i                 | 1.46                          | 4.30-0.027i     |
| 499.1                | 3.71-0.060i              | 3.64-0.43i                 | 1.46                          | 4.29-0.025i     |
| 514.5                | 3.67-0.050i              | 3.60-0.40i                 | 1.46                          | 4.21-0.016i     |
| 524.6                | 3.65-0.050i              | 3.58-0.37i                 | 1.46                          | 4.17-0.012i     |
| 526.8                | 3.64-0.050i              | 3.57-0.37i                 | 1.46                          | 4.15-0.011i     |
| 532.0                | 3.62-0.050i              | 3.57-0.37i                 | 1.46                          | 4.21-0.010i     |
| 542.8                | 3.61-0.050i              | 3.54-0.36i                 | 1.46                          | 4.10-0.0077i    |
| 545.1                | 3.60-0.050i              | 3.53-0.37i                 | 1.46                          | 4.22-0.0075i    |
| 632.8                | 3.46-0.044i              | 3.50-0.39i                 | 1.46                          | 4.14-0.0010i    |
| 648.1                | 3.43-0.040i              | 3.48-0.36i                 | 1.46                          | 4.16-0.0015i    |
| 651.4                | 3.43-0.040i              | 3.48-0.37i                 | 1.46                          | 4.09-0.0016i    |

## REFERENCES

- 1 H. Asahina and a Morita, *J. Phys. C Solid State Phys.*, 2000, **17**, 1839–1852.
- 2 I. H. Malitson, *J. Opt. Soc. Am.*, 1965, **55**, 1205.
- 3 G. Vuye, S. Fisson, V. Nguyen Van, Y. Wang, J. Rivory and F. Abelès, *Thin Solid Films*, 1993, **233**, 166–170.
